# Supplementary material for: The relationship between Dietary Inflammatory Index and Polycystic Ovary Syndrome in Iranian Women: A Case-Control Study
Source: Research Square preprint supplement (doi:10.21203/rs.3.rs-6236460/v1), 2025-03-26
Supplement: Supplementary file 1 [file 56b23338ec5300c9b2a5e790.docx]

**Supplementary file 1.** Participant flow chart

Final Control Group

(N=100 - Exclusions)

Final PCOS Group

(N=100 - Exclusions)

Excluded:

-Failed to complete study

-Specific last 2 months

-Implausible energy intake (<800 or >4200 kcal/day)

Excluded:

-Specific diet last 3 months

-Smokers

-Pregnant or breastfeeding

Control Group (N=100)

PCOS Group (Cases) (N=100)

Participants Assessed for Eligibility (N=200)
